# Supplementary material for: Diversity Distribution, Driving Factors and Assembly Mechanisms of Free-Living and Particle-Associated Bacterial Communities at a Subtropical Marginal Sea
Source: MDPI journal article supplement (doi:10.3390/microorganisms9122445), 2021-11-27
Supplement: s1 [file s1]

## Supplementary Information

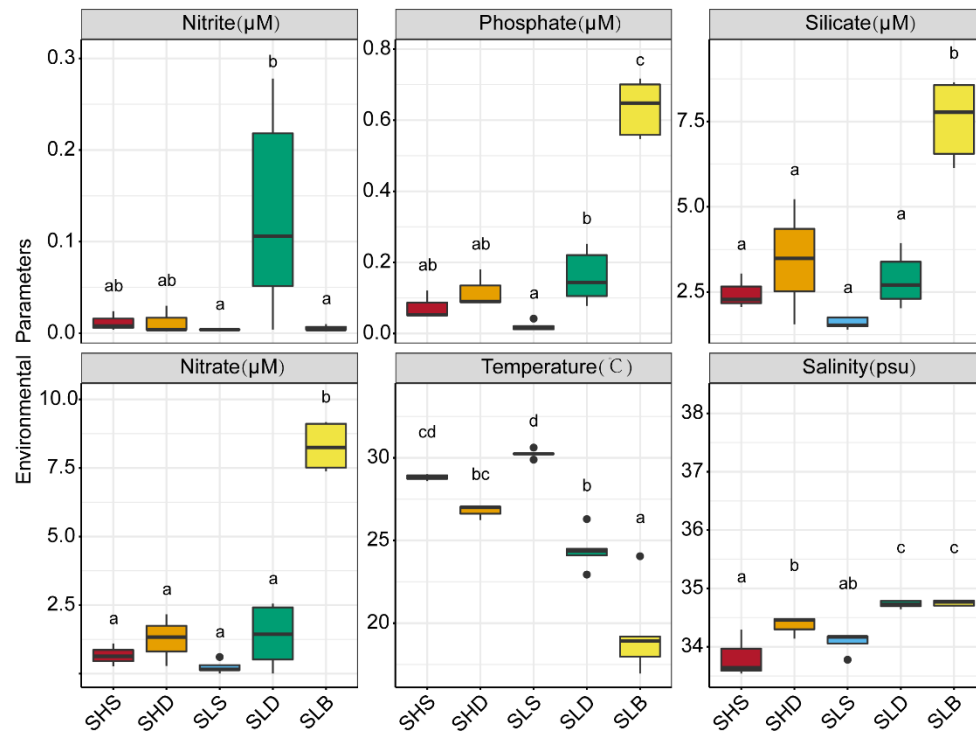

**Fig. S1. An overview of environmental data at each depth in both the C6 and C9 sampled stations.** The boxplots are constructed with the first and third quartiles of the distribution of values, and the medians. The lines extending from the boxes (whiskers) indicate the variability outside the first and third quartiles. Data are expressed as mean  $\pm$  sd. Different alphabets above data bars indicate significantly different values ( $P < 0.05$ , ANOVA, Tukey's HSD).

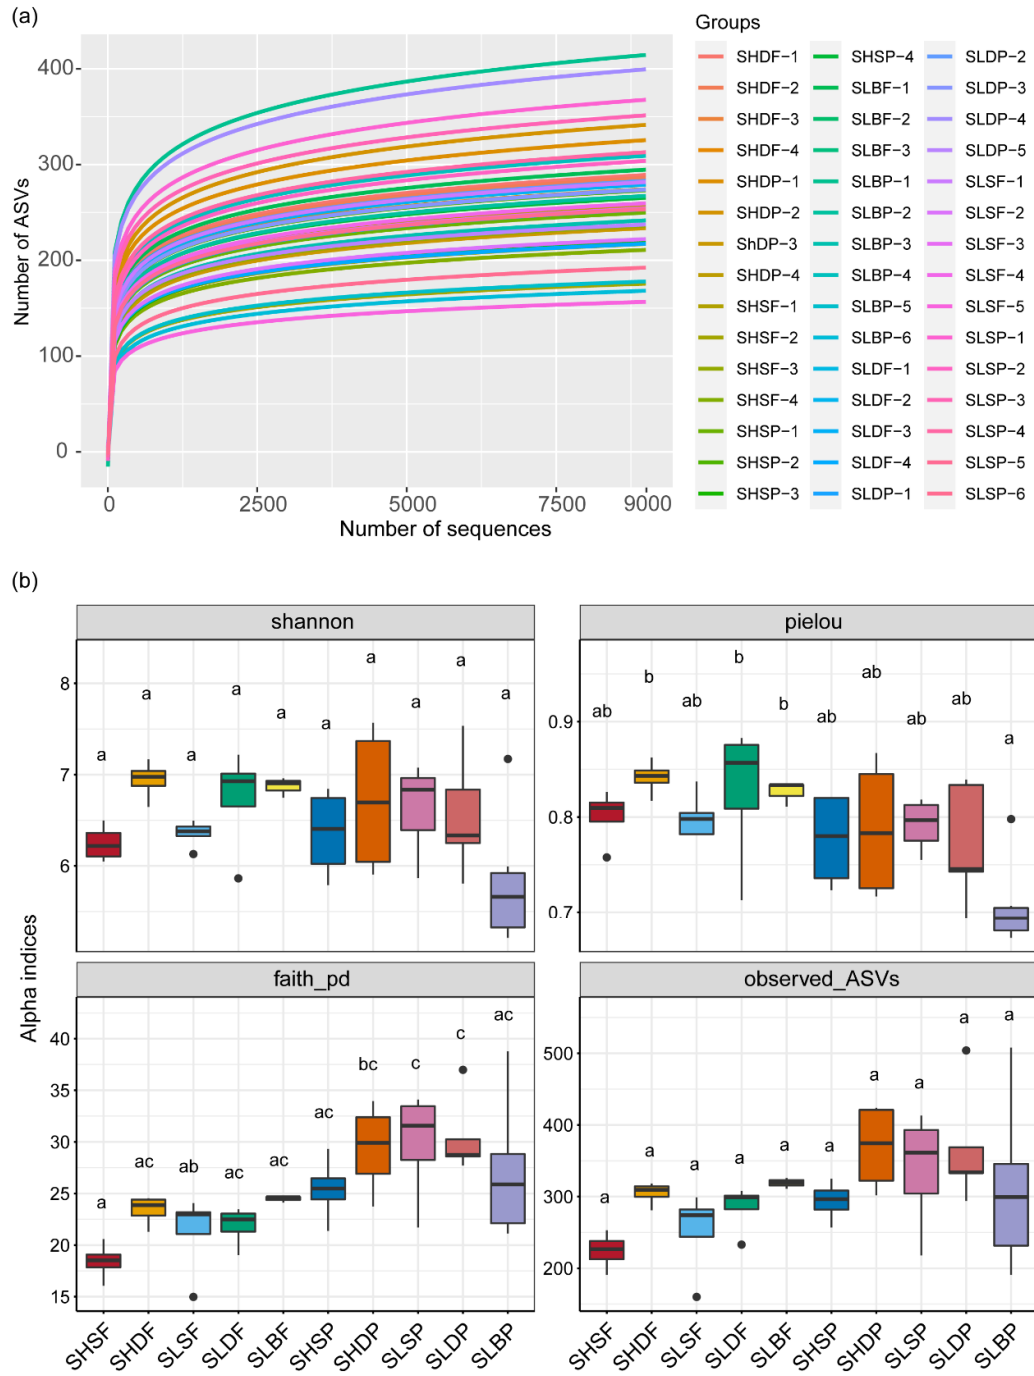

**Fig. S2. (a) Rarefaction curves of detected bacterial species of all the samples; (b) Distribution of average alpha-diversity at each group.** The boxplots are constructed with the first and third quartiles of the distribution of values, and the medians. The lines extending from the boxes (whiskers) indicate the variability outside the first and third quartiles. Data are expressed as mean  $\pm$ sd. Different alphabets above data bars indicate significantly different values ( $P < 0.05$ , ANOVA, Tukey's HSD).

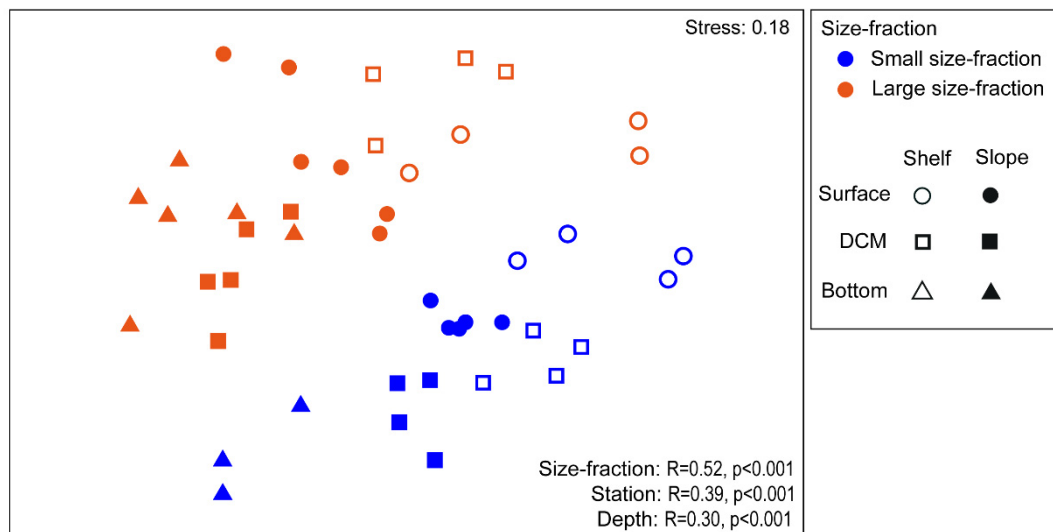

**Fig. S3. nMDS ordinations representing the Bray-Curtis distance between bacterioplankton communities.** Anosim analysis of the effects of station, depth and size-fraction on bacterioplankton community similarity.

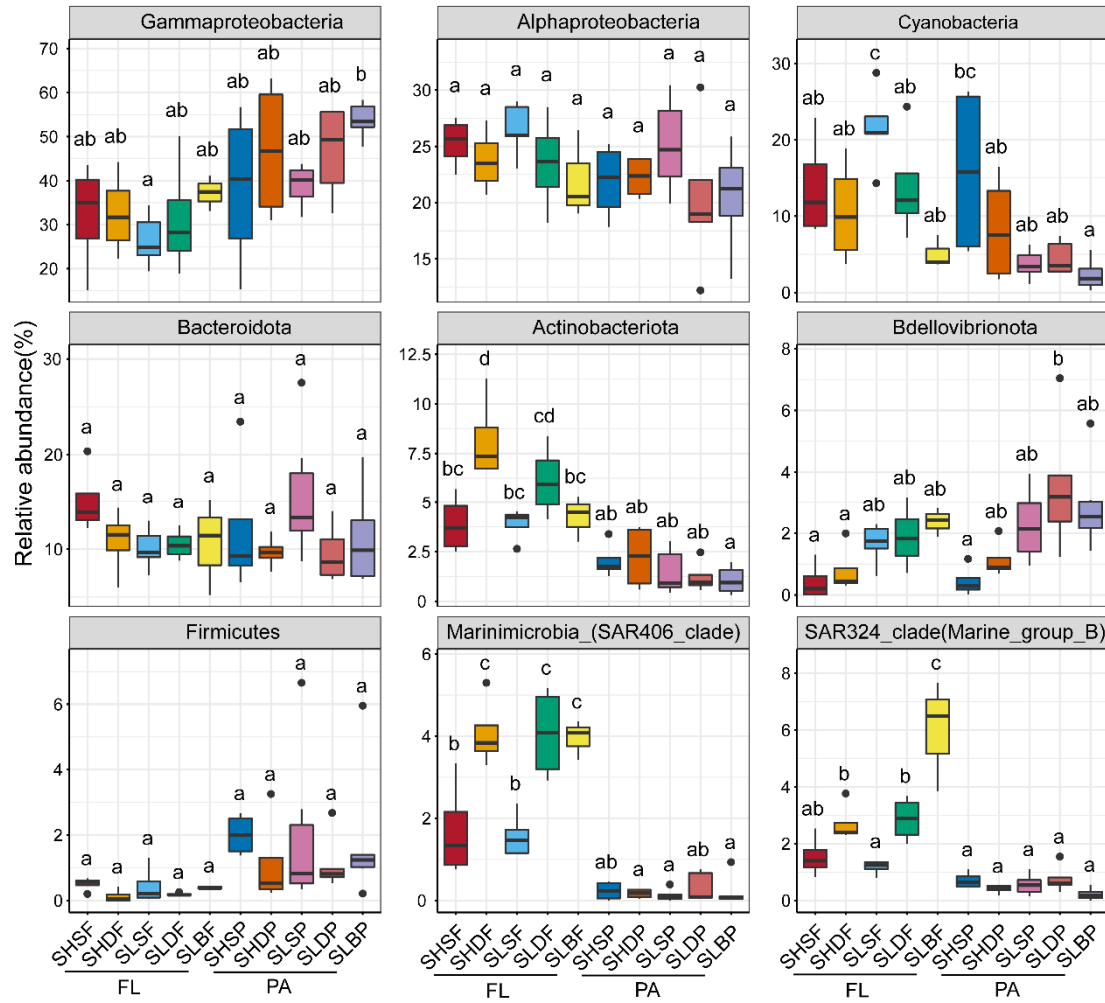

**Fig. S4. Relative abundance of top nine bacterial taxa at the Phylum/class level.** The median values are shown with horizontal black wide lines. Boxplots were constructed with the upper and lower lines corresponding to the first and third quartile of the distribution of values, and the lower and upper whiskers represent the minimum and maximum of all data, respectively. Data are expressed as mean  $\pm$  sd. Different alphabets above data bars indicate significantly different values ( $P < 0.05$ , ANOVA, Tukey's HSD).

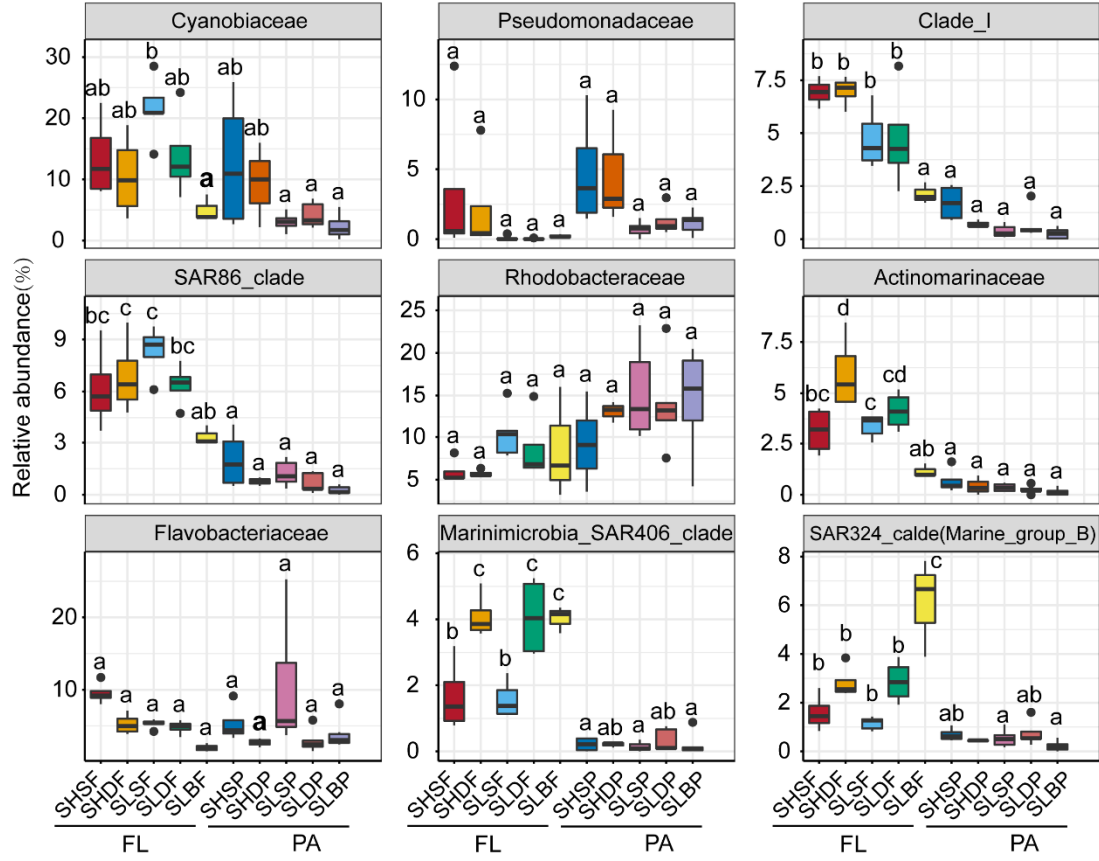

**Fig. S5. Relative abundance of top nine bacterial taxa at the family level.** The median values are shown with horizontal black thick lines. Boxplots were constructed with the top and bottom corresponding to the first and third quartile of the distribution of values, and the lower and upper whiskers represent the minimum and maximum of all data, respectively. Data are expressed as mean  $\pm$  sd. Different alphabets above data bars indicate significantly different values ( $P < 0.05$ , ANOVA, Tukey's HSD).

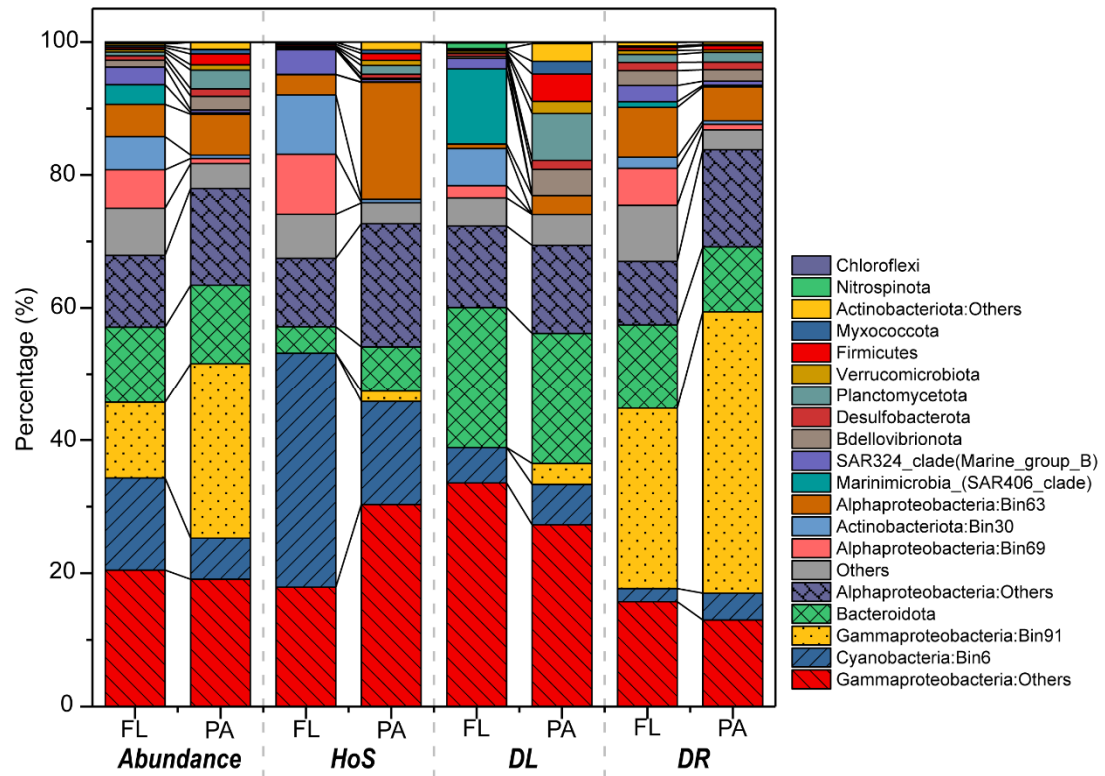

**Fig. S6. Ecological processes controlling major phylogenetic bins.** Relative abundances of different phyla and their relative contributions to homogeneous selection (HoS), dispersal limitation(DL) and drift (DR) under free-living (FL) and particle-associated (PA). Top 5 abundant bins were particularly highlighted.

**Table S1. Permutational multivariate analysis of variance (PERMANOVA) examining the effects of the factors station, depth and size-fraction on bacterioplankton community structure.** Key to abbreviations and column headings: D.f, degrees of freedom; SS, sum of squares; MS, mean square; F, F ratio;  $R^2$ , coefficient of determination; P, p-value. \*\*\* =  $p < 0.001$ .

|                      | D.f. | SS    | MS   | F    | $R^2$ | p-value |
|----------------------|------|-------|------|------|-------|---------|
| <b>Size-fraction</b> | 1    | 2.18  | 2.18 | 9.95 | 0.19  | ***     |
| <b>Station</b>       | 1    | 1.67  | 1.67 | 7.24 | 0.14  | ***     |
| <b>Depth</b>         | 2    | 0.80  | 0.80 | 3.19 | 0.069 | ***     |
| <b>Residuals</b>     | 41   | 30.21 |      |      |       |         |
| <b>Total</b>         | 45   | 34.86 |      |      |       |         |

**Table S2. Group information of all samples.** Samples grouped by two size fractions (free-living and particle-associated), different stations (Slope and Shelf), and depth (Surface, DCM and Bottom). Site names: SL = Slope, SH = Shelf, S = Surface, D = DCM, B=Bottom, F = free-living, and P = particle-associated.

| Groups      | Replicate | Size-fraction |       | By Depth   |        |           | By Station |           |
|-------------|-----------|---------------|-------|------------|--------|-----------|------------|-----------|
|             |           | PA(P)         | FL(F) | Surface(S) | DCM(D) | Bottom(B) | Shelf(SH)  | Slope(SL) |
| <b>SHSF</b> | 4         |               | √     | √          |        |           | √          |           |
| <b>SHDF</b> | 4         |               | √     |            | √      |           | √          |           |
| <b>SLSF</b> | 5         |               | √     | √          |        |           |            | √         |
| <b>SLDF</b> | 4         |               | √     |            | √      |           |            | √         |
| <b>SLBF</b> | 3         |               | √     |            |        | √         |            | √         |
| <b>SHSP</b> | 4         | √             |       | √          |        |           | √          |           |
| <b>SHDP</b> | 4         | √             |       |            | √      |           | √          |           |
| <b>SLSP</b> | 6         | √             |       | √          |        |           |            | √         |
| <b>SLDP</b> | 5         | √             |       |            | √      |           |            | √         |
| <b>SLBP</b> | 6         | √             |       |            |        | √         |            | √         |

**Table S3. Results of two-way ANOVAs with factors for habitat and depth interaction for the alpha diversity indices of bacterioplankton communities.**

| <b>Indicators</b>    | <b>Factors</b> | <b>F</b> | <b>p-value</b> |
|----------------------|----------------|----------|----------------|
| <b>shannon</b>       | station        | 4.302    | 0.0393         |
|                      | depth          | 19.393   | 1.93e-08       |
|                      | station:depth  | 4.649    | 0.0106         |
| <b>pielou</b>        | station        | 12.173   | 0.000593       |
|                      | depth          | 26.039   | 8.38e-11       |
|                      | station:depth  | 1.923    | 0.148723       |
| <b>Faith_pd</b>      | station        | 10.971   | 0.001094       |
|                      | depth          | 5.317    | 0.005606       |
|                      | station:depth  | 8.927    | 0.000192       |
| <b>Observed_ASVs</b> | station        | 2.682    | 0.10301        |
|                      | depth          | 10.490   | 4.6e-05        |
|                      | station:depth  | 4.989    | 0.00767        |

**Table S4. Summary of the coefficient of determination ( $R^2$ ) from the Permutational multivariate analysis of variance (PERMANOVA) examining the effects of the factors station and depth for each of the two size-fractions. \*\*\*=  $p < 0.001$ ; \*\*=  $p < 0.01$ .**

|           | <b>By Depth</b>         |                | <b>By Station</b>       |                |
|-----------|-------------------------|----------------|-------------------------|----------------|
|           | <b><math>R^2</math></b> | <b>p-value</b> | <b><math>R^2</math></b> | <b>p-value</b> |
| <b>FL</b> | 0.174                   | ***            | 0.226                   | ***            |
| <b>PA</b> | 0.098                   | **             | 0.185                   | ***            |



**Table S5. ANOSIM (analysis of similarity) statistics of bacterioplankton community composition between samples grouped following Table S2.**

| <b>Groups</b> | <b>Sample statistic R</b> | <b>No.of Monte carlo permutations with Scores <math>\geq R</math></b> | <b>P Value</b> |
|---------------|---------------------------|-----------------------------------------------------------------------|----------------|
| FLvs.PA       | 0.718                     | 999                                                                   | 0.001          |
| SHSF vs.SHDF  | 0.490                     | 999                                                                   | 0.051          |
| SHSF vs.SLSF  | 0.931                     | 999                                                                   | 0.01           |
| SHSF vs.SLDF  | 1                         | 999                                                                   | 0.031          |
| SHSF vs.SLBF  | 1                         | 999                                                                   | 0.03           |
| SHSF vs.SHSP  | 0.260                     | 999                                                                   | 0.161          |
| SHSF vs.SHDP  | 0.667                     | 999                                                                   | 0.031          |
| SHSF vs.SLSP  | 0.869                     | 999                                                                   | 0.004          |
| SHSF vs.SLDP  | 1                         | 999                                                                   | 0.01           |
| SHSF vs.SLBP  | 1                         | 999                                                                   | 0.005          |
| SHDF vs.SLSF  | 0.9625                    | 999                                                                   | 0.013          |
| SHDF vs.SLDF  | 0.667                     | 999                                                                   | 0.028          |
| SHDF vs.SLBF  | 1                         | 999                                                                   | 0.027          |
| SHDF vs.SHSP  | 0.646                     | 999                                                                   | 0.025          |
| SHDF vs.SHDP  | 0.698                     | 999                                                                   | 0.032          |
| SHDF vs.SLSP  | 0.921                     | 999                                                                   | 0.007          |
| SHDF vs.SLDP  | 0.988                     | 999                                                                   | 0.008          |
| SHDF vs.SLBP  | 1                         | 999                                                                   | 0.01           |
| SLSF vs.SLDF  | 0.806                     | 999                                                                   | 0.009          |
| SLSF vs.SLBF  | 1                         | 999                                                                   | 0.016          |
| SLSF vs.SHSP  | 0.875                     | 999                                                                   | 0.007          |
| SLSF vs.SHDP  | 0.95                      | 999                                                                   | 0.007          |
| SLSF vs.SLSP  | 0.773                     | 999                                                                   | 0.001          |
| SLSF vs.SLDP  | 0.956                     | 999                                                                   | 0.012          |
| SLSF vs.SLBP  | 0.989                     | 999                                                                   | 0.002          |
| SLDF vs.SLBF  | 1                         | 999                                                                   | 0.032          |
| SLDF vs.SHSP  | 0.854                     | 999                                                                   | 0.031          |
| SLDF vs.SHDP  | 0.865                     | 999                                                                   | 0.031          |
| SLDF vs.SLSP  | 0.869                     | 999                                                                   | 0.013          |
| SLDF vs.SLDP  | 0.819                     | 999                                                                   | 0.009          |
| SLDF vs.SLBP  | 0.905                     | 999                                                                   | 0.007          |
| SLBF vs.SHSP  | 0.741                     | 999                                                                   | 0.059          |
| SLBF vs.SHDP  | 0.963                     | 999                                                                   | 0.039          |
| SLBF vs.SLSP  | 0.833                     | 999                                                                   | 0.011          |
| SLBF vs.SLDP  | 0.733                     | 999                                                                   | 0.016          |
| SLBF vs.SLBP  | 0.926                     | 999                                                                   | 0.01           |

|              |       |     |       |
|--------------|-------|-----|-------|
| SHSP vs.SHDP | 0.021 | 999 | 0.344 |
| SHSP vs.SLSP | 0.548 | 999 | 0.009 |
| SHSP vs.SLDP | 0.463 | 999 | 0.02  |
| SHSP vs.SLBP | 0.536 | 999 | 0.015 |
| SHDP vs.SLSP | 0.623 | 999 | 0.007 |
| SHDP vs.SLDP | 0.394 | 999 | 0.029 |
| SHDP vs.SLBP | 0.5   | 999 | 0.017 |
| SLSP vs.SLDP | 0.403 | 999 | 0.016 |
| SLSP vs.SLBP | 0.431 | 999 | 0.005 |
| SLDP vs.SLBP | 0.12  | 999 | 0.118 |

The ANOSIM statistic compares the mean of ranked dissimilarities between groups to the mean of ranked dissimilarities within groups. An R-value close to “1” suggests dissimilarity between groups while an R-value near “0” suggests an even distribution of high and low ranks within and between groups, respectively.

**Table S6 Fit of the neutral model for bacterioplankton community.**  $R^2$  indicates the fit to the neutral model. Group names: SL = Slope, SH = Shelf, S = Surface, D = DCM, B=Bottom, F = free-living, and P = particle-associated. The  $R^2$  value represents the goodness of fit to the NCM, and the m value represents the migration rate of the species.

| Groups | FL    |       | PA    |       |
|--------|-------|-------|-------|-------|
|        | $R^2$ | m     | $R^2$ | m     |
| SHS    | 0.649 | 0.034 | 0.564 | 0.033 |
| SHD    | 0.576 | 0.052 | 0.517 | 0.038 |
| SLS    | 0.655 | 0.070 | 0.518 | 0.033 |
| SLD    | 0.601 | 0.047 | 0.560 | 0.040 |
| SLB    | 0.543 | 0.048 | 0.548 | 0.043 |

**Table S7 Summary of the contribution of the ecological processes that determine community assembly of bacterioplankton Continental Shelf-Slope Region at a subtropical marginal sea .** The percentages are given the relative contribution of each process to the community turnover. Group names: SL = Slope, SH = Shelf, S = Surface, D = DCM, B=Bottom, F = free-living, and P = particle-associated. Relative importance of process estimated by iCAMP: Heterogeneous selection (HeS), Homogeneous selection (HoS), Homogenizing dispersal (HD), Dispersal limitation (DL), Drift (DR).

| Size-fraction | Groups | HeS<br>(%) | HoS<br>(%) | DL<br>(%) | HD<br>(%) | DR<br>(%) | Stochasticity<br>(%) |
|---------------|--------|------------|------------|-----------|-----------|-----------|----------------------|
| FL            | SHSF   | 0.33       | 29.12      | 17.47     | 6.05      | 47.03     | 70.76                |
|               | SHDF   | 0.29       | 30.69      | 17.90     | 5.74      | 45.39     | 68.97                |
|               | SLSF   | 0.42       | 39.95      | 3.68      | 4.30      | 51.65     | 59.97                |
|               | SLDF   | 0.12       | 37.47      | 8.46      | 2.41      | 51.54     | 62.29                |
|               | SLBF   | 1.09       | 30.83      | 15.87     | 2.36      | 49.85     | 68.14                |
| PA            | SHSP   | 0.08       | 14.87      | 25.90     | 0.81      | 58.34     | 85.12                |
|               | SHDP   | 0.32       | 15.67      | 22.01     | 3.82      | 58.18     | 84.01                |
|               | SLSP   | 0.42       | 13.29      | 27.81     | 4.04      | 54.45     | 86.04                |
|               | SLDP   | 0.68       | 11.36      | 20.18     | 3.36      | 64.42     | 88.13                |
|               | SLBP   | 0.08       | 12.98      | 12.69     | 1.77      | 72.48     | 86.90                |
